# Supplementary material for: Dual chemosensor for the rapid detection of mercury(ii) pollution and biothiols
Source: Royal Society of Chemistry journal article supplement (doi:10.1039/c9an01055f), 2019-01-01

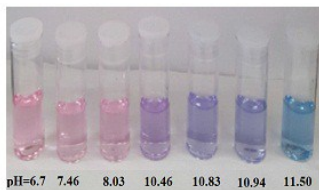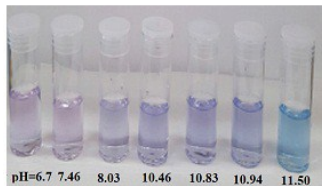

Chemosensor colour in the absence of  $\text{Hg}^{2+}$  ions

Chemosensor colour in the presence of  $\text{Hg}^{2+}$  ions

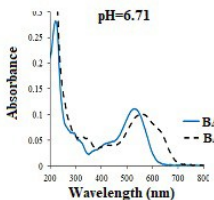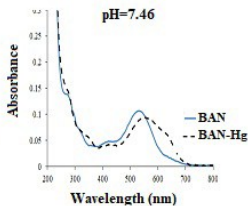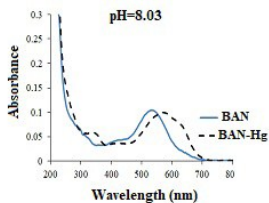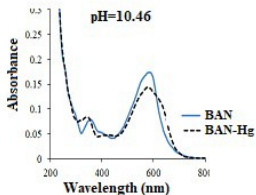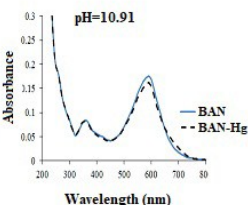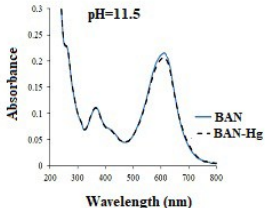

Supplement: c9an01055f11.pdf [file c9an01055f11.pdf]
