# Supplementary material for: Dual chemosensor for the rapid detection of mercury(ii) pollution and biothiols
Source: Royal Society of Chemistry journal article supplement (doi:10.1039/c9an01055f), 2019-01-01
Supplement: c9an01055f13.pdf [file c9an01055f13.pdf]

## Supporting Information

### Dual Chemosensor for the Rapid Detection of Mercury (II) Pollution and Biothiols

Mahnaz D.Gholami<sup>a</sup>, Sergei Manzhos<sup>b</sup>, Prashant Sonar<sup>a</sup>, Godwin A. Ayoko<sup>a</sup>, Emad L. Izake<sup>b\*</sup>

<sup>a</sup> Queensland University of Technology(QUT), School of Chemistry, Physics and Mechanical Engineering, 2 George street QLD, 4000, Australia

<sup>b</sup> Centre Énergie Matériaux Télécommunications, Institute National de la Recherche Scientifique, 1650, boulevard Lionel-Boulet, Varennes QC J3X1S2 Canada.

\* Corresponding author e-mail: [e.kiriakous@qut.edu.au](mailto:e.kiriakous@qut.edu.au)

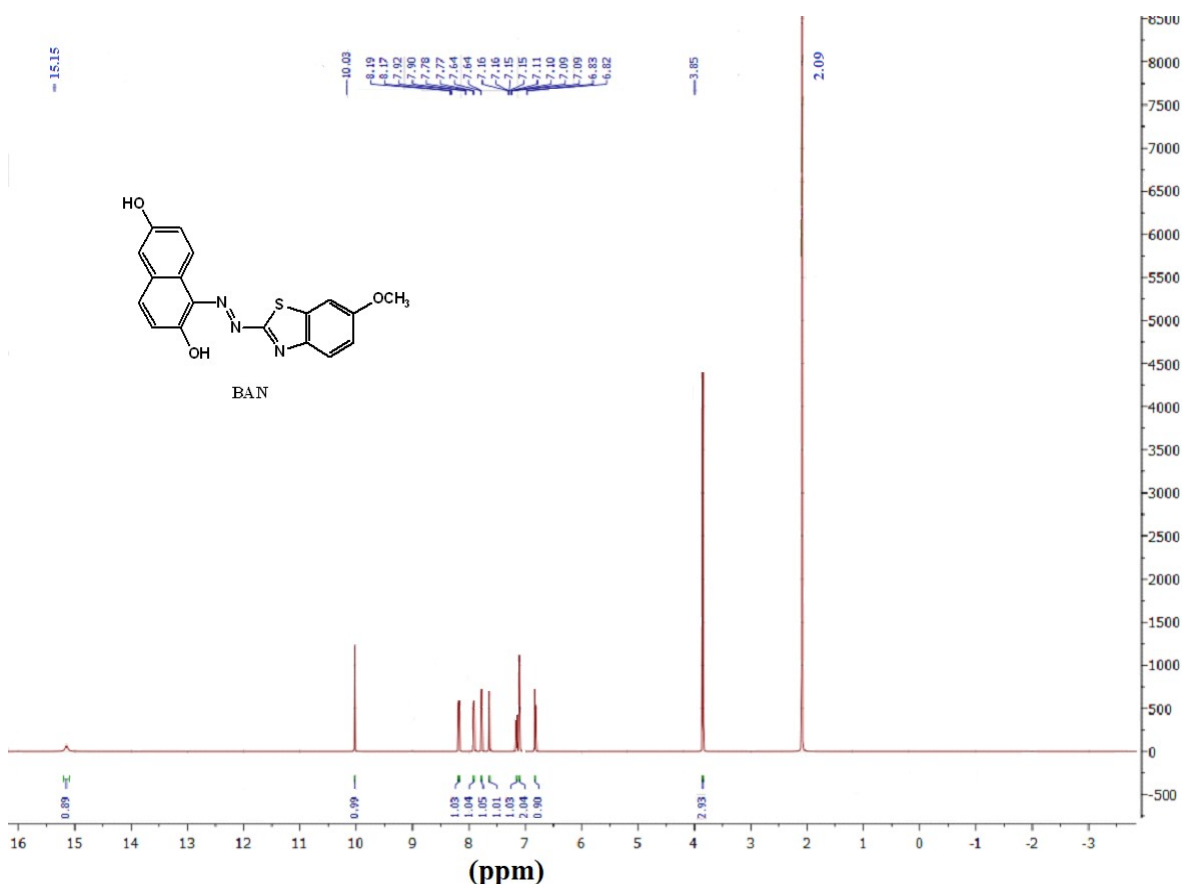

**Fig. S1.** <sup>1</sup>H NMR (600 MHz, DMSO-d<sub>6</sub>) spectrum of BAN.

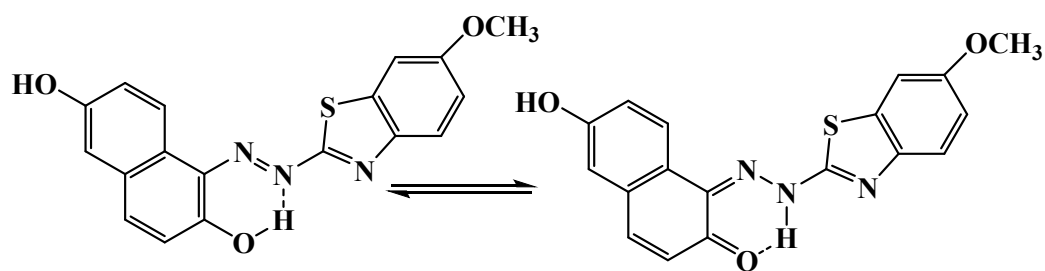

**Fig. S2.** Azo-hydrazone tautomerism of BAN.

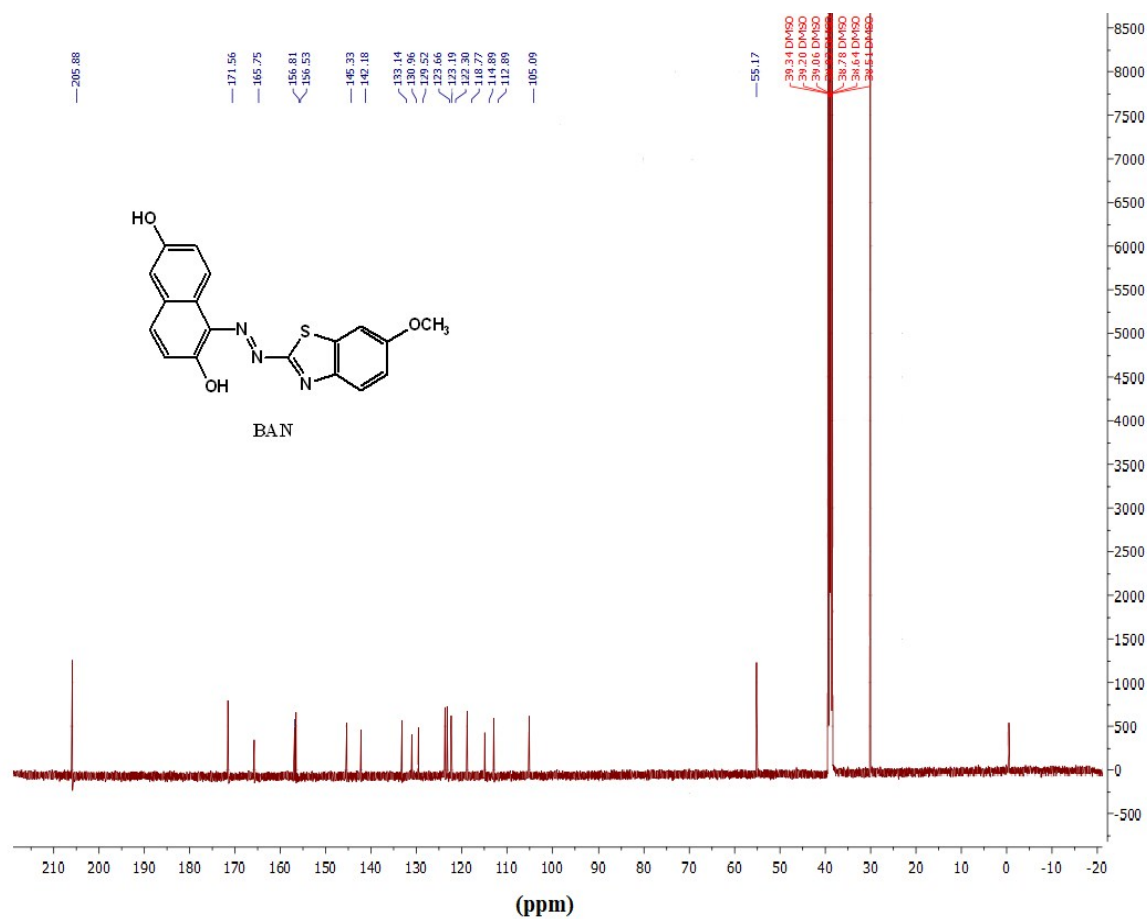

**Fig. S3.** <sup>13</sup>C NMR (151 MHz, DMSO-d<sub>6</sub>) spectrum of BAN.

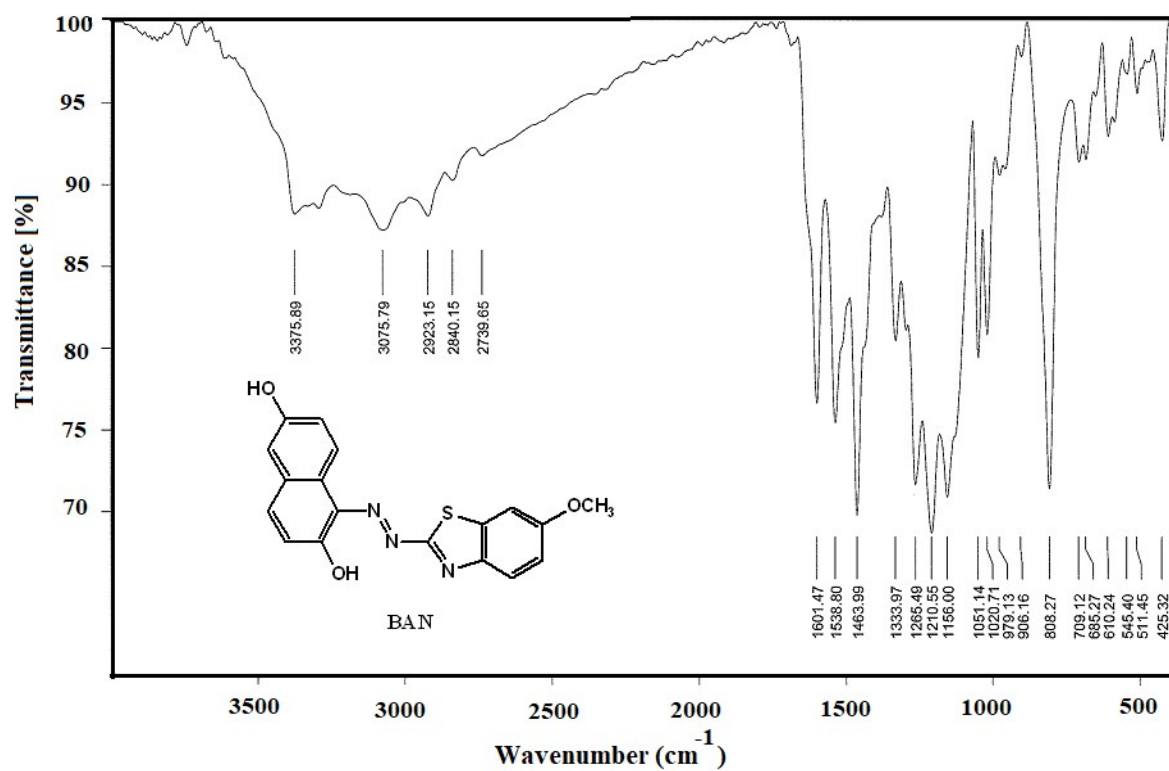

Fig. S4. FTIR spectrum of BAN.

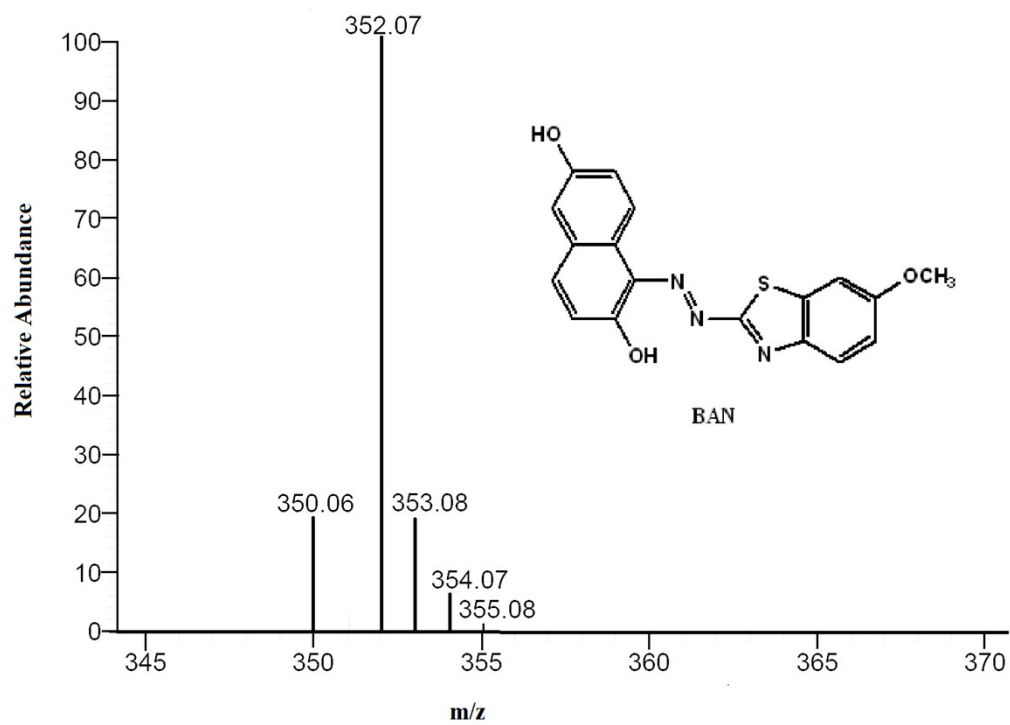

Fig. S5. Mass spectrometry of BAN.

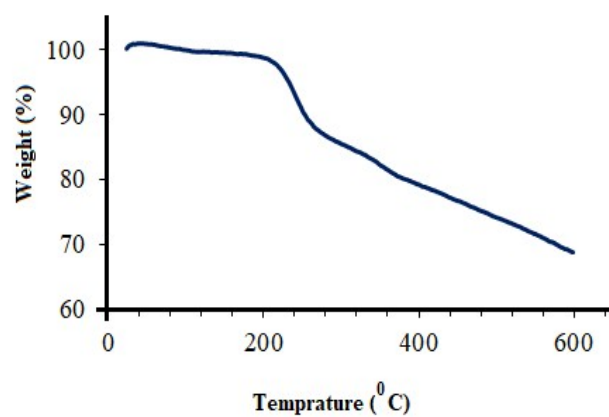

**Fig. S6.** TGA thermogram of BAN.

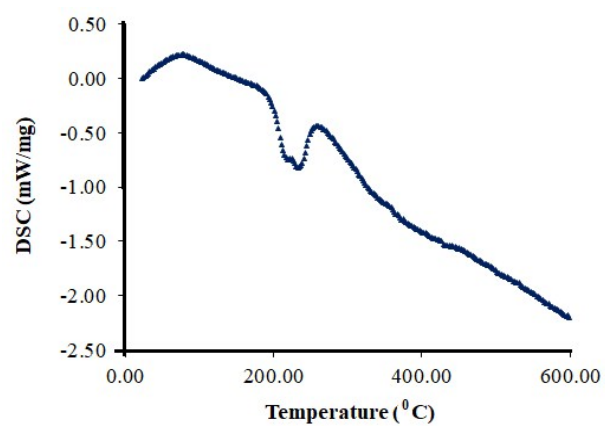

**Fig. S7:** DSC analysis of BAN.

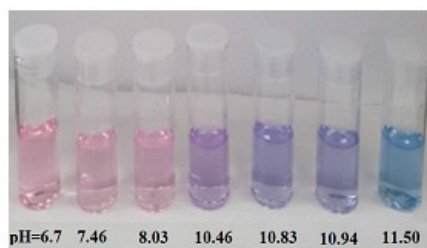

BAN colour in absence of  $\text{Hg}^{2+}$  ions

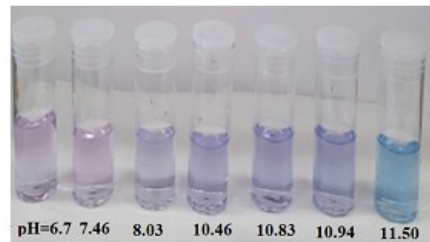

BAN colour in presence of  $\text{Hg}^{2+}$  ions

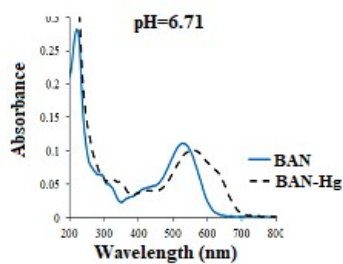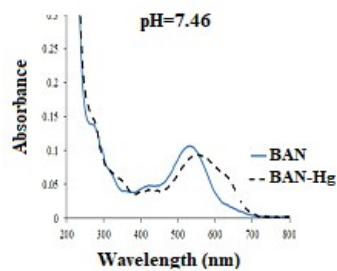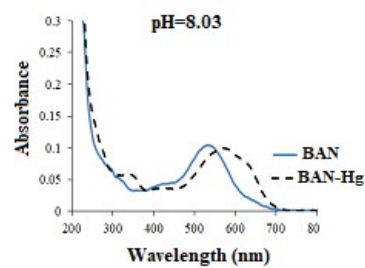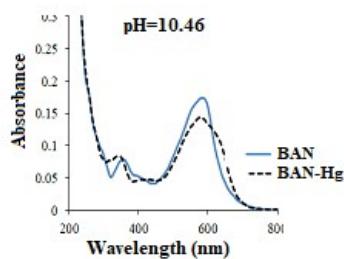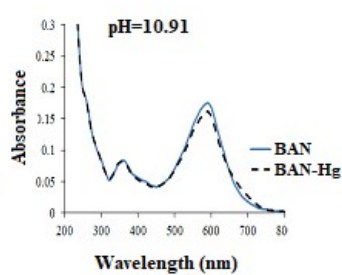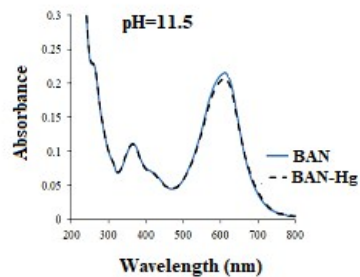

**Fig. S8.** Colour change and UV-VIS spectra of chemosensor BAN in the absence and presence of  $\text{Hg}^{2+}$  ions at different values.

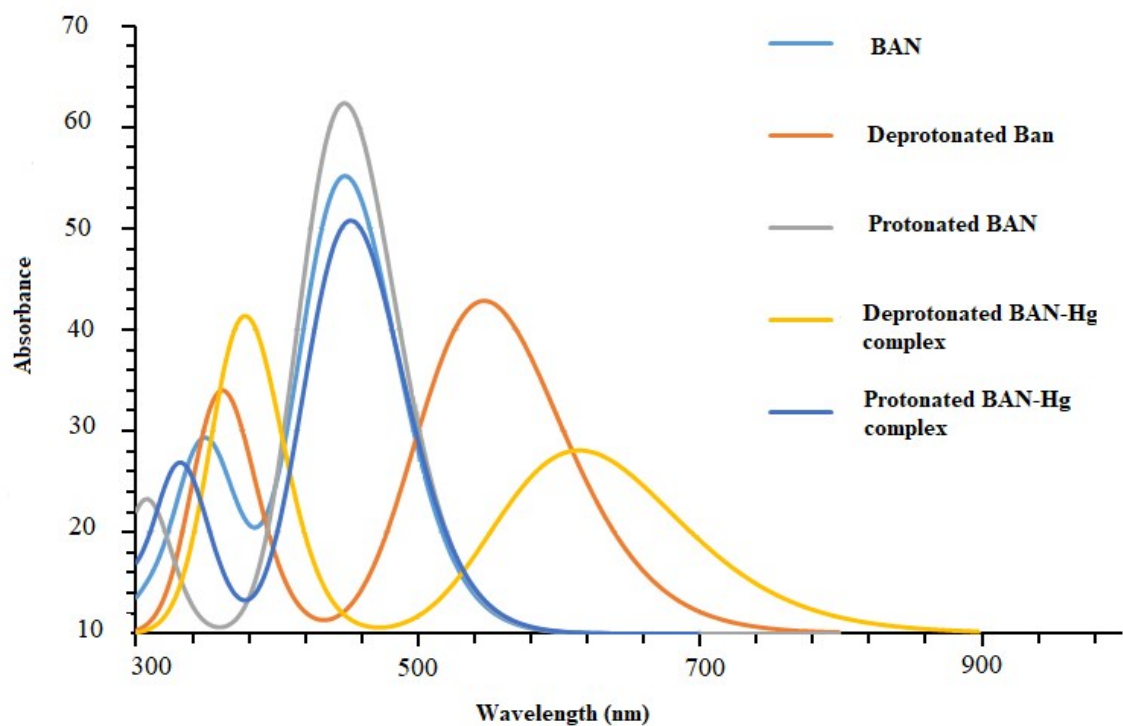

**Fig. S9.** Computed absorption spectra of BAN and deprotonated BAN (a Gaussian broadening of 0.25 eV HWHM is applied).

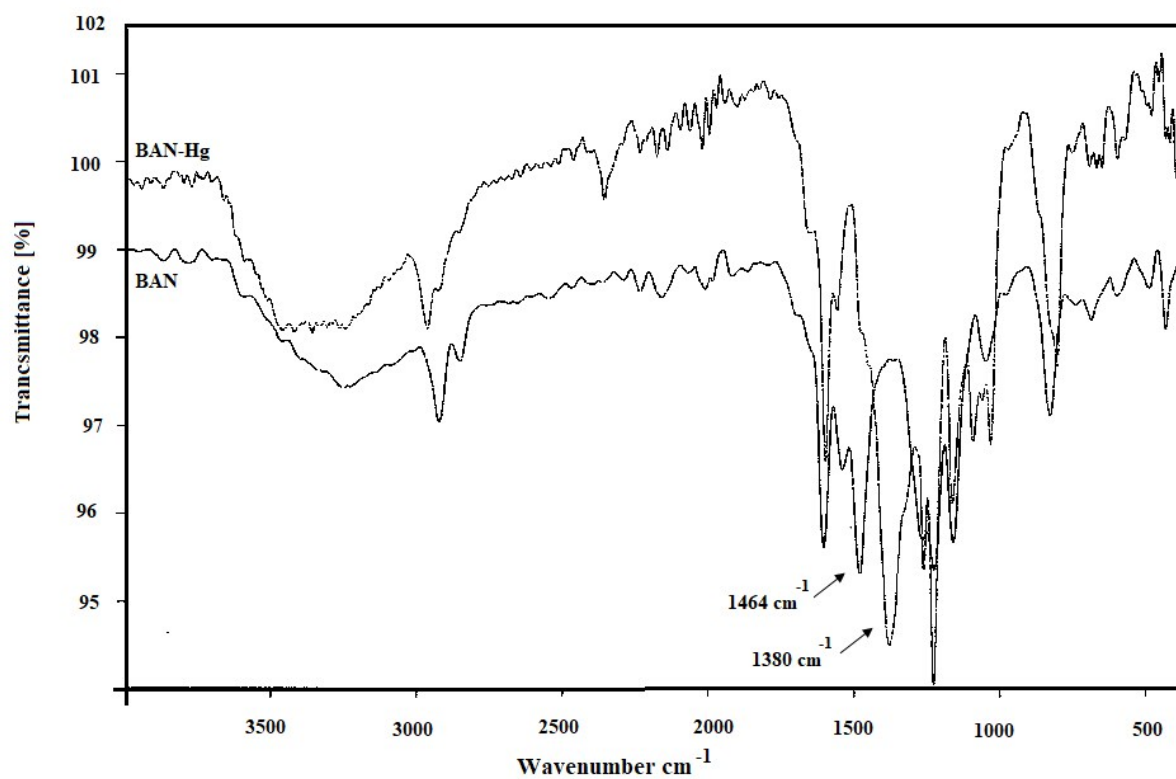

**Fig. S10.** FT-IR Spectra of BAN and BAN -  $\text{Hg}^{2+}$  complex.

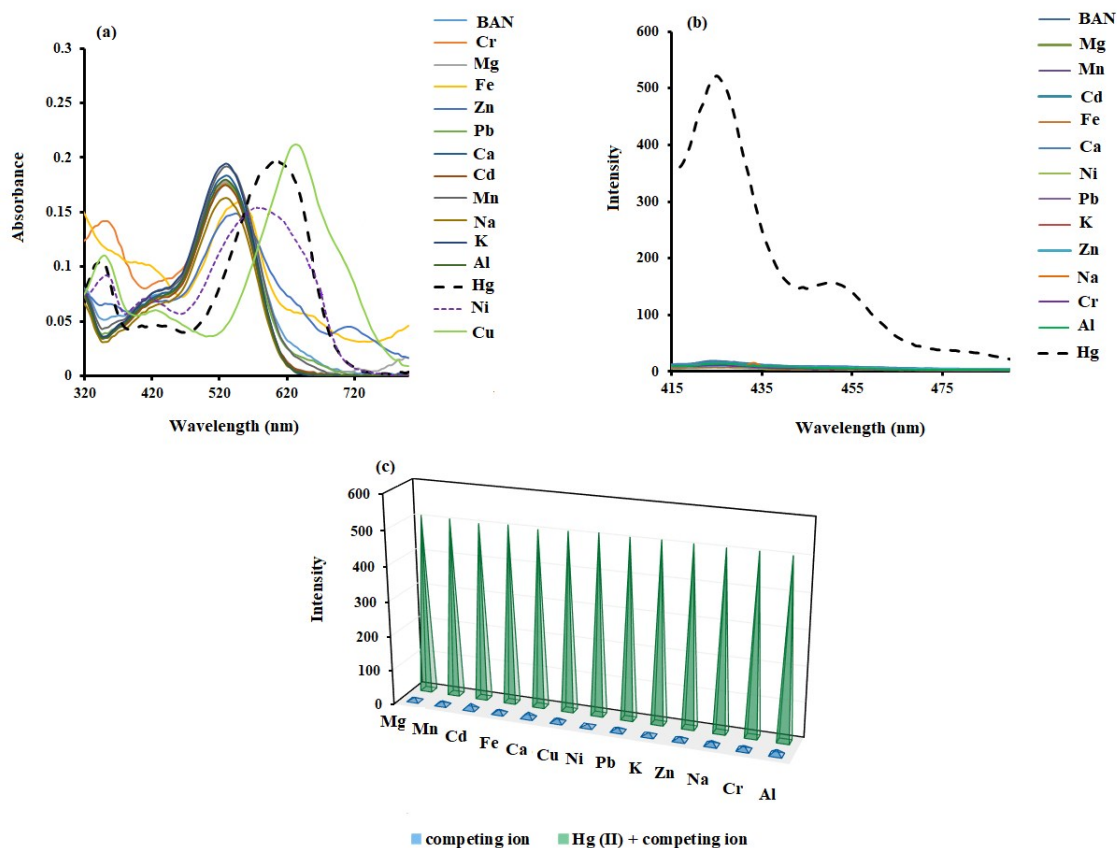

**Fig. S11.** (a) UV–Vis spectra of BAN ( $1 \times 10^{-5}$  M) after the addition of 13 metal ions ( $5 \times 10^{-5}$  M), (b) Fluorescence emission spectra of BAN ( $1 \times 10^{-5}$  M) after the addition 13 metal ions ( $5 \times 10^{-5}$  M). (c) The fluorescence emission of BAN ( $1 \times 10^{-5}$  M) when interacted with 13 different metal ions ( $5 \times 10^{-5}$  M) in the absence and the presence of  $5 \times 10^{-6}$  M  $\text{Hg}^{2+}$  ions. The excitation wavelength was set at  $\lambda_{\text{ex}} = 252$  nm and the fluorescence emission recorded at 425 nm

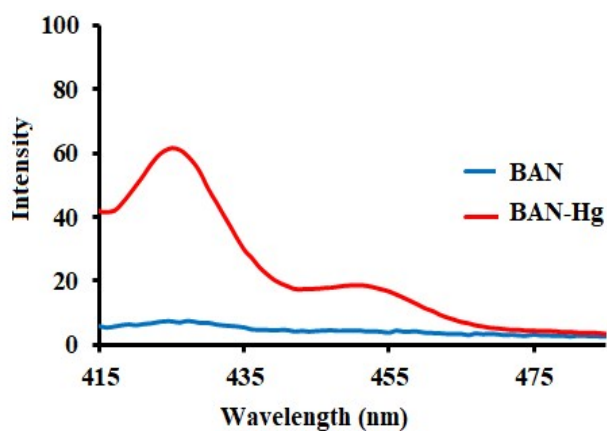

**Fig. S12.** Fluorescence emission spectra of BAN ( $1 \times 10^{-7}$  M) before and after interaction with blank and spiked tap water ( $\text{Hg}^{2+}$  concentration =  $5 \times 10^{-8}$  M) at pH 8. The excitation wavelength was set at  $\lambda_{\text{ex}} = 252$  nm.

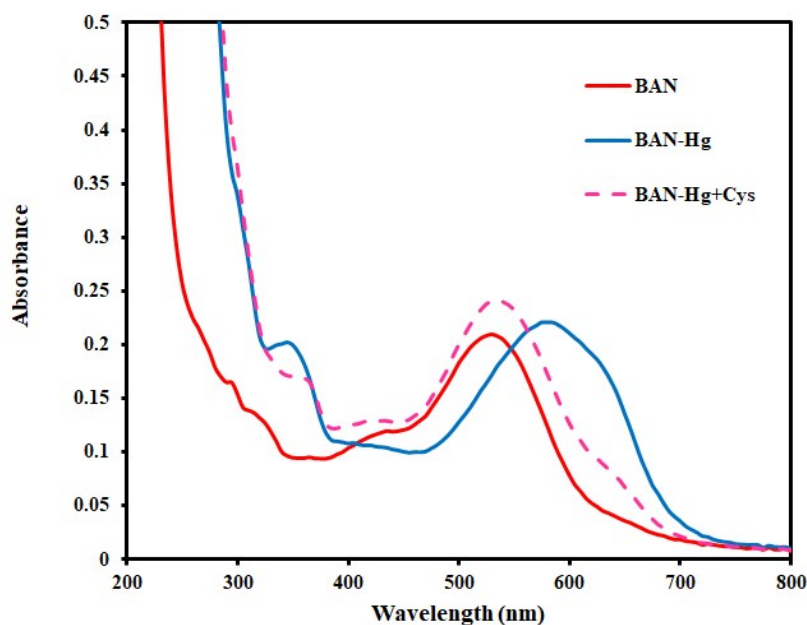

**Fig. S13.** The UV-Vis spectra of a) BAN dye ( $5 \times 10^{-6}$  M in ACN:  $\text{H}_2\text{O}$ , 1:1 v/v), b) BAN- $\text{Hg}^{2+}$  complex and c) The BAN- $\text{Hg}^{2+}$  complex after the addition of cysteine.

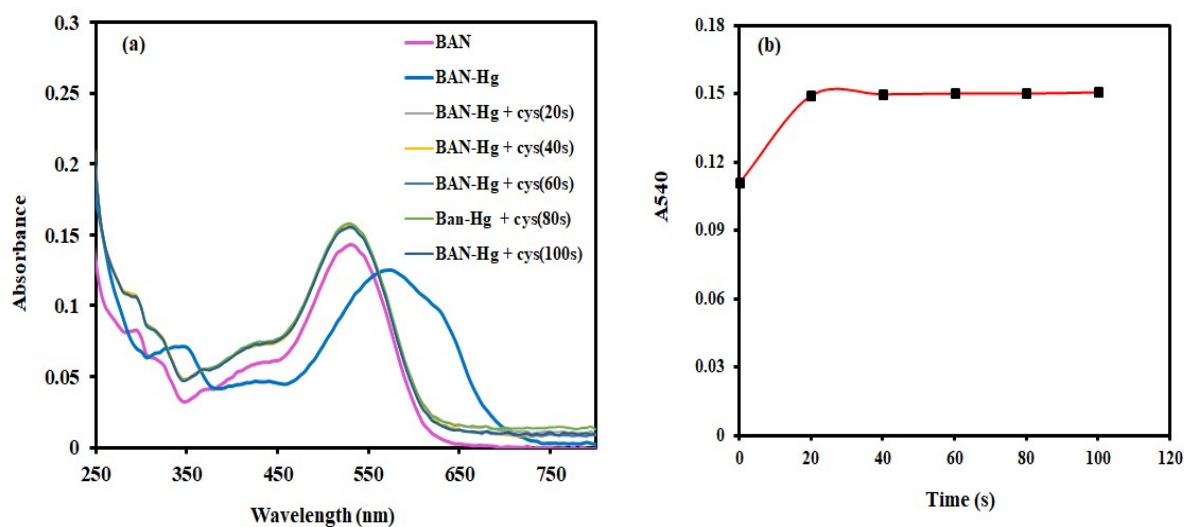



**Fig. S14.** (a) The UV-Vis spectra of BAN-Hg<sup>2+</sup> complex (5×10<sup>-6</sup> M in ACN: H<sub>2</sub>O, 1:1 v/v) after addition of cysteine during 100 s, (b) Plotted absorbance at 540 nm against time (s).

### Determination of Quantum yield

The luminescence quantum yield was measured using anthracene ( $\phi_f = 0.27$  in ethanol) as a reference dye. Both the BAN compound and the reference were excited at the same wavelength ( $\lambda_{ex}=252$  nm), maintaining nearly equal absorbance ( $\sim 0.1$ ), and the emission spectra were obtained at 425 nm. The quantum yield is calculated according to the following equation:

$$\phi_S = \phi_R \left[ \frac{A_S}{A_R} \right] \left[ \frac{Abs_R}{Abs_S} \right] \left[ \frac{n_S^2}{n_R^2} \right]$$

where A is the integrated intensity of the luminescence, Abs is absorbance at the excitation wavelength, n is the refractive index of the solvent and  $\phi$  is fluorescence quantum yield.

**Table S1.** Comparison of optical probes for Hg<sup>2+</sup> ions.

| Chemosensor                                                                         | Detection mode | LOD    | LOQ | Comments                                                                                                                                     | Ref          |
|-------------------------------------------------------------------------------------|----------------|--------|-----|----------------------------------------------------------------------------------------------------------------------------------------------|--------------|
| 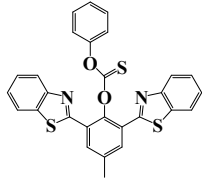   | Fluorescence   | 55nM   | NA  | Requires complex synthesis procedures. LOD is above the maximum allowable level of Hg <sup>2+</sup> in drinking water.                       | <sup>1</sup> |
|    | Fluorescence   | 50 nM  | NA  | LOD is above the maximum allowable level of Hg <sup>2+</sup> in drinking water.                                                              | <sup>2</sup> |
|   | UV-vis         | 188 nM | NA  | LOD is above the maximum allowable level of Hg <sup>2+</sup> in drinking water.                                                              | <sup>3</sup> |
|  | Fluorescence   | 27nM   | NA  | Suffers from interferences by Fe <sup>3+</sup> ions. LOD is above the maximum allowable level of Hg <sup>2+</sup> in drinking water.         | <sup>4</sup> |
|  | Fluorescence   | 11 nM  | NA  | The LOD satisfies the maximum allowable level of Hg <sup>2+</sup> in drinking water. The screening time for Hg <sup>2+</sup> ions is 30 min. | <sup>5</sup> |
|  | Fluorescence   | 1.2 nM | NA  | The LOD is below the maximum allowable level of Hg <sup>2+</sup> in drinking water. The screening time for Hg <sup>2+</sup> ions is 30 min.  | <sup>6</sup> |

|                                                                                   |              |        |    |                                                                                                                                                |   |
|-----------------------------------------------------------------------------------|--------------|--------|----|------------------------------------------------------------------------------------------------------------------------------------------------|---|
| 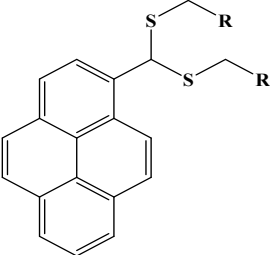 | Fluorescence | 1.8 nM | NA | The LOD is below the maximum allowable level of $\text{Hg}^{2+}$ in drinking water.<br>The screening time for $\text{Hg}^{2+}$ ions is 30 min. | 7 |
|-----------------------------------------------------------------------------------|--------------|--------|----|------------------------------------------------------------------------------------------------------------------------------------------------|---|

**Table S1.** Continued.

| Chemosensor                                                                         | Detection mode | LOD     | LOQ     | Comments                                                                                                                                         | Ref |
|-------------------------------------------------------------------------------------|----------------|---------|---------|--------------------------------------------------------------------------------------------------------------------------------------------------|-----|
| 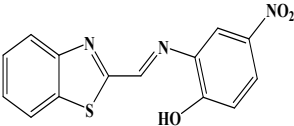   | UV-vis         | 150 nM  | 510 nM  | The LOD is above the maximum allowable level of $\text{Hg}^{2+}$ in drinking water.                                                              | 8   |
|   | Fluorescence   | 27 nM   | NA      | The LOD is above the maximum allowable level of $\text{Hg}^{2+}$ in drinking water.                                                              | 9   |
|  | Fluorescence   | 9.45 nM | 50 nM   | Spontaneous detection. Can be used as a paper based sensor. The LOD satisfies the maximum allowable level of $\text{Hg}^{2+}$ in drinking water. |     |
|                                                                                     | UV-vis         | 470 nM  | 2500 nM |                                                                                                                                                  |     |

## References

- 1 J. Xu, Z. Xu, Z. Wang, C. Liu, B. Zhu, X. Wang, K. Wang, J. Wang and G. Sang, *Luminescence*, 2018, **33**, 219-224.
- 2 K. Wang, X. Mao, L. Cao, G. Lv, X. Dong, Y. He and Y. Wei, *J. Fluoresc.*, 2017, **27**, 1739-1745.
- 3 D. S. Lim, S. Y. Park, K. S. Hwang and S.-K. Chang, *Tetrahedron Lett.*, 2018, **59**, 1819-1822.
- 4 J. Liu and Y. Qian, *J. Lumin.*, 2017, **187**, 33-39.
- 5 K. Nie, B. Dong, H. Shi, Z. Liu and B. Liang, *Anal. Chem.*, 2017, **89**, 2928-2936.
- 6 G. Wang, W. Xu, H. Yang and N. Fu, *Dyes Pigm.*, 2018, **157**, 369-376.
- 7 Y. Gao, T. Ma, Z. Ou, W. Cai, G. Yang, Y. Li, M. Xu and Q. Li, *Talanta*, 2018, **178**, 663-669.
- 8 B. K. Momidi, V. Tekuri and D. R. Trivedi, *Inorg. Chem. Commun.*, 2016, **74**, 1-5.
- 9 S.-L. Pan, K. Li, L.-L. Li, M.-Y. Li, L. Shi, Y.-H. Liu and X.-Q. Yu, *Chem. Commun.*, 2018, **54**, 4955-4958.
