# Supplementary figures and images for: Dual chemosensor for the rapid detection of mercury(ii) pollution and biothiols
Source: Royal Society of Chemistry journal article supplement (doi:10.1039/c9an01055f), 2019-01-01

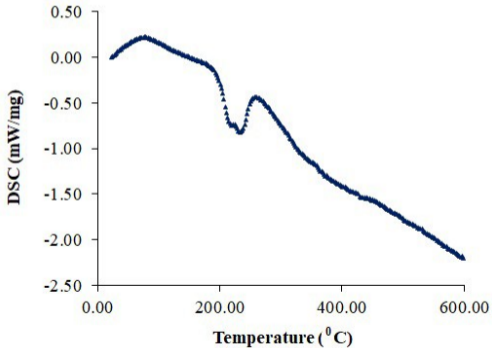

Supplement: c9an01055f10.pdf [file c9an01055f10.pdf]

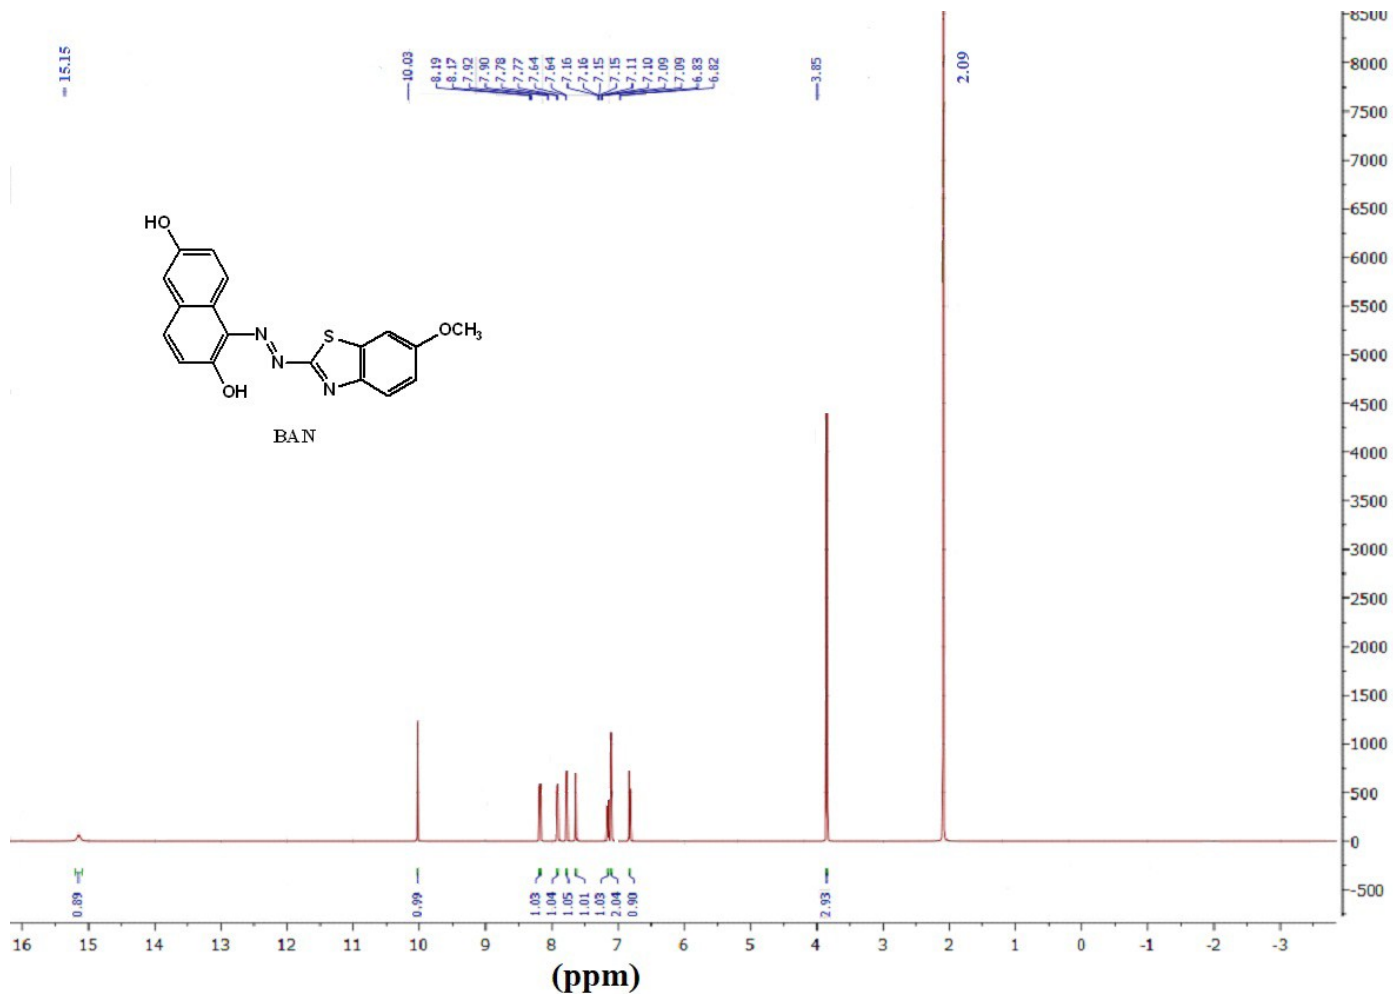

Supplement: c9an01055f2.pdf [file c9an01055f2.pdf]

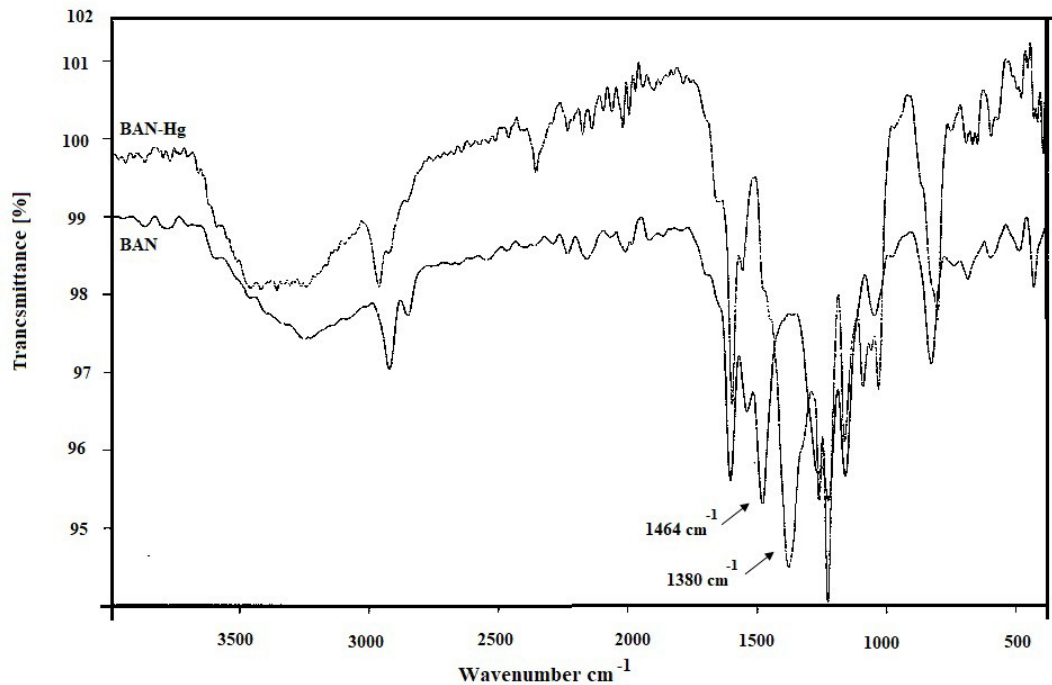

Supplement: c9an01055f3.pdf [file c9an01055f3.pdf]

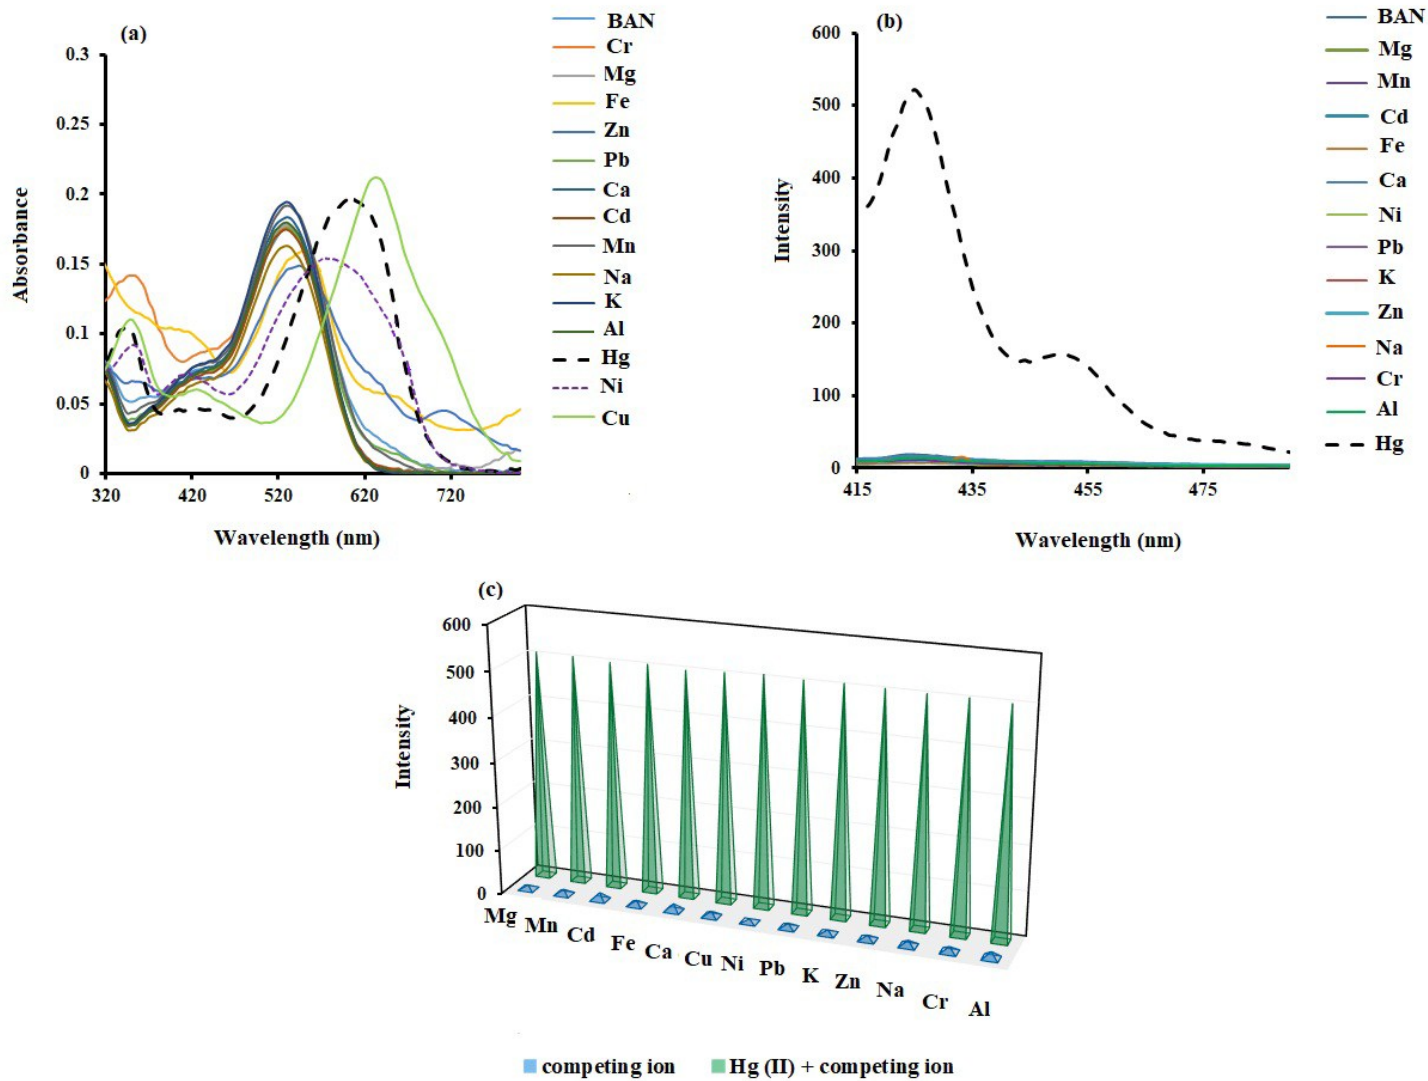

Supplement: c9an01055f4.pdf [file c9an01055f4.pdf]

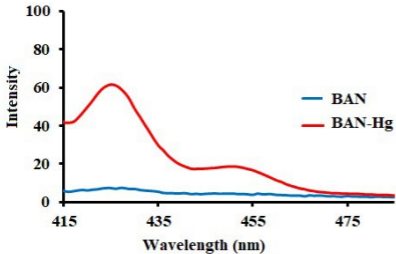

Supplement: c9an01055f5.pdf [file c9an01055f5.pdf]

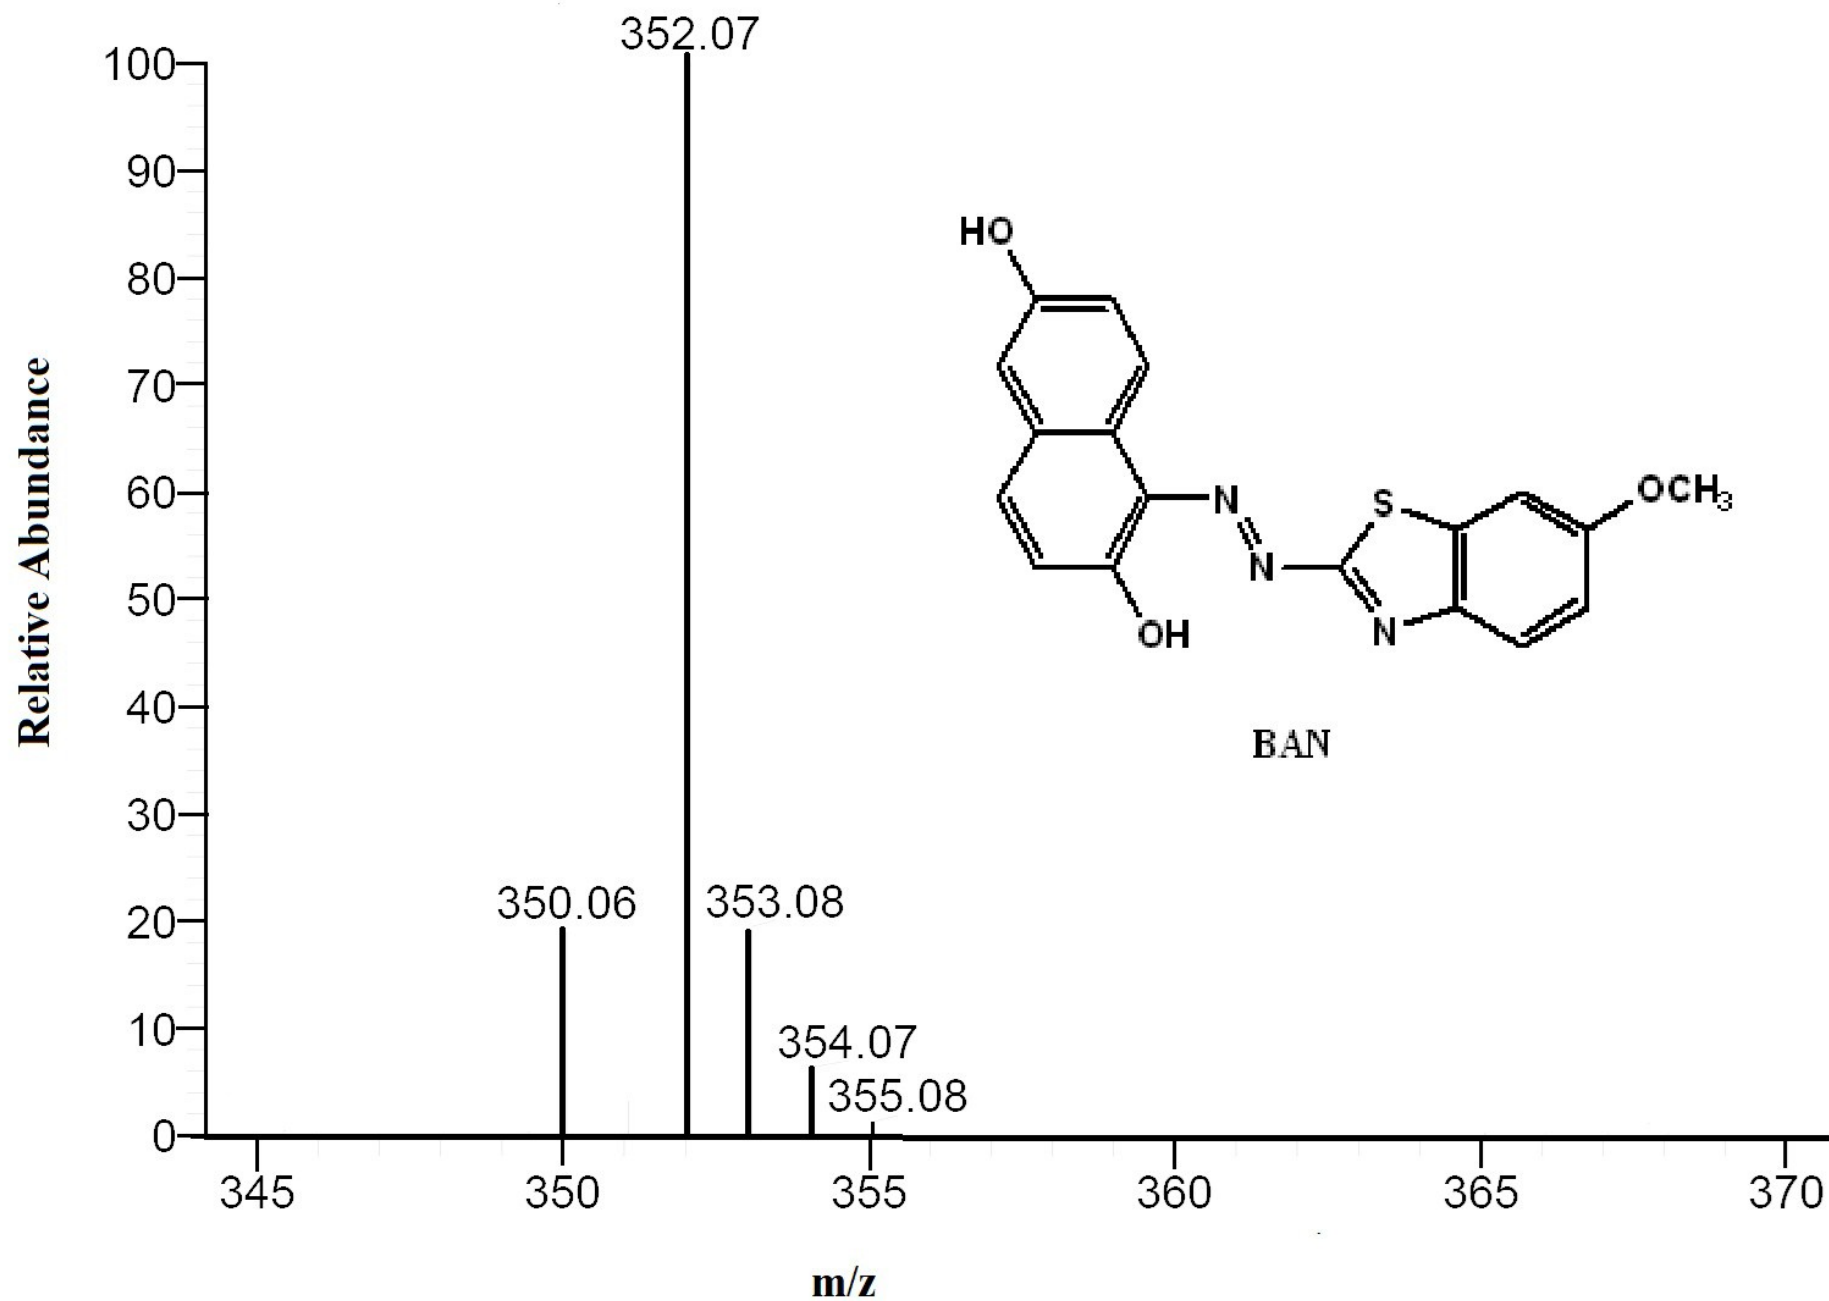

Supplement: c9an01055f8.pdf [file c9an01055f8.pdf]

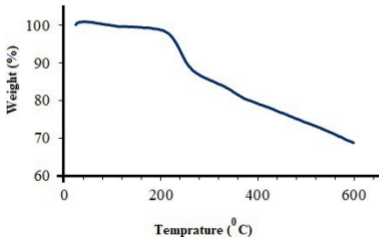

Supplement: c9an01055f9.pdf [file c9an01055f9.pdf]
